# Supplementary material for: Preparation and Characterization of Novel Green Seaweed Films from Ulva rigida
Source: MDPI journal article supplement (doi:10.3390/polym15163342), 2023-08-08
Supplement: s1 [file s1]

**Supplementary Table S1.** FTIR peaks and corresponding functional group

| Film                                      | Functional group   | Mode                                                    | Wavenumber (cm <sup>-1</sup> ) |
|-------------------------------------------|--------------------|---------------------------------------------------------|--------------------------------|
| Control film                              | C-O                | Stretching                                              | 1026                           |
|                                           |                    |                                                         | 1055                           |
|                                           | C-O-S              | Asymmetrical sulphate stretching                        | 980                            |
|                                           | C-O-S              | Symmetrical sulphate stretching                         | 848                            |
| Addition of glycerol and triethyl citrate | C-H                | Bending                                                 | 1500–1200                      |
|                                           | C-O                | Stretching                                              | 980–1250                       |
|                                           | C=O in ester bonds | Stretching                                              | 1735                           |
|                                           | C-OH in O-C=O      | Deforming and symmetric stretching                      | 1425                           |
|                                           | HO-C=O             | Stretching                                              | 1629                           |
|                                           | S=O                | Stretching                                              | 1200–1250                      |
|                                           | C-O-S              | Stretching                                              | 840–845                        |
|                                           | O-H                | Stretching, intra- and inter-molecular hydrogen bonding | 3000–3700                      |
|                                           | C-H                | Stretching                                              | 2850–3050                      |

**Supplementary Table S2.** TGA onset temperature, weight loss in each stage of degradation and char residue

| Sample                         | First stage             |            | Second stage            |            | Third stage             |            | Fourth stage            |            | Char residue (%) |
|--------------------------------|-------------------------|------------|-------------------------|------------|-------------------------|------------|-------------------------|------------|------------------|
|                                | T <sub>onset</sub> (°C) | Wt loss(%) |                  |
| Control                        | 52.3                    | 28.5       | 206.4                   | 31.2       | 574.7                   | 9.3        | 724.0                   | 9.5        | 21.5             |
| 20% glycerol                   | 52.2                    | 32.3       | 206.7                   | 39.2       | 574.8                   | 9.7        | 724.8                   | 7.1        | 11.7             |
| 30% glycerol                   | 52.2                    | 33.1       | 206.7                   | 40.9       | 574.7                   | 9.2        | 724.8                   | 7.0        | 9.7              |
| 20% triethyl citrate           | 52.2                    | 31.1       | 207.2                   | 32.2       | 575.5                   | 10.9       | 725.7                   | 8.9        | 16.9             |
| 30% triethyl citrate           | 52.2                    | 30.3       | 207.7                   | 32.3       | 575.5                   | 11.4       | 725.7                   | 8.8        | 17.2             |
| 20% glycerol/ triethyl citrate | 51.7                    | 31.4       | 207.7                   | 35.7       | 575.0                   | 10.0       | 724.8                   | 8.7        | 14.2             |
| 30% glycerol/ triethyl citrate | 52.2                    | 31.0       | 207.2                   | 39.9       | 574.7                   | 10.7       | 725.3                   | 7.8        | 10.6             |
